# Supplementary material for: Association of Metabolomic Change and Treatment Response in Patients with Non-Alcoholic Fatty Liver Disease
Source: MDPI journal article supplement (doi:10.3390/biomedicines10061216), 2022-05-24

## Supplementary material

### Table of contents

1. Supplementary Table S1
2. Supplementary Table S2
3. Supplementary Table S3
4. Supplementary Figure S1
5. Supplementary Figure S2

**Supplementary Table S1. Significantly different changes in metabolite levels between the good and non-response groups were defined by transient elastography after receiving two treatments (ezetimibe + statin and statin alone).** (a) Significant metabolites associated with an improvement in CAP values. (b) Significant metabolites associated with an improvement in LSM values. Metabolite changes were defined as changes in concentration compared with the baseline values. A *P* value of <0.05 was considered significant, and the FDR *P* value of <0.1.

| (a) Steatosis               | Metabolite                    | % change from the baseline |                         | <i>P</i> value | FDR<br><i>P</i> value |
|-----------------------------|-------------------------------|----------------------------|-------------------------|----------------|-----------------------|
|                             |                               | Good                       | Poor                    |                |                       |
| Ezetimibe + statin (n = 18) | TG 17:1_32:1                  | -81.7 [-93.3 to -76.6]     | -25.6 [-62.2 to +13.0]  | 0.001          | 0.10                  |
|                             | TG 18:0_32:1                  | -71.7 [-73.8 to -69.8]     | -42.8 [-54.3 to +76.4]  | 0.002          | 0.10                  |
|                             | TG 16:0_30:2                  | -85.8 [-95.8 to -76.2]     | -52.0 [-65.1 to +136.9] | 0.003          | 0.10                  |
|                             | TG 16:1_32:2                  | -70.4 [-94.6 to -60.0]     | -15.1 [-40.8 to +24.3]  | 0.003          | 0.10                  |
|                             | TG 16:1_34:0                  | -66.0 [-77.8 to -63.3]     | -23.0 [-55.6 to +22.0]  | 0.003          | 0.10                  |
|                             | TG 16:0_34:1                  | -66.2 [-75.0 to -60.1]     | -40.8 [-56.2 to -2.4]   | 0.005          | 0.10                  |
|                             | TG 16:1_34:1                  | -63.2 [-81.5 to -53.7]     | -22.7 [-50.8 to +16.5]  | 0.005          | 0.10                  |
|                             | TG 20:4_32:1                  | -70.5 [-74.3 to -67.7]     | -23.1 [-45.1 to +94.9]  | 0.005          | 0.10                  |
|                             | TG 22:6_32:0                  | -74.6 [-83.3 to -64.7]     | -50.1 [-62.3 to -30.2]  | 0.005          | 0.10                  |
|                             | TG 14:0_38:5                  | -73.8 [-85.7 to -62.6]     | -5.6 [-45.6 to +66.9]   | 0.007          | 0.10                  |
|                             | TG 16:0_32:0                  | -80.4 [-89.9 to -61.7]     | -30.7 [-56.7 to +21.9]  | 0.007          | 0.10                  |
|                             | TG 16:0_32:1                  | -80.9 [-86.3 to -68.1]     | -54.3 [-66.0 to +53.5]  | 0.007          | 0.10                  |
|                             | TG 16:1_32:1                  | -71.6 [-80.5 to -65.8]     | -29.5 [-51.3 to +8.5]   | 0.007          | 0.10                  |
|                             | TG 18:1_30:0                  | -76.9 [-88.6 to -58.8]     | -49.1 [-62.4 to +61.5]  | 0.007          | 0.10                  |
|                             | Saturated mono-unsaturated TG | -67.9 [-78.9 to -58.2]     | -42.6 [-58.2 to +14.1]  | 0.01           | 0.07                  |
|                             | Xanthine                      | -39.7 [-62.3 to -14.4]     | +47.0 [-7.3 to +80.7]   | 0.01           | 0.03                  |

|                 |              |                        |                        |        |       |
|-----------------|--------------|------------------------|------------------------|--------|-------|
| Statin (n = 23) | FA 18:1      | −45.7 [−60.9 to −29.2] | +35.4 [−10.8 to +54.5] | <0.001 | 0.003 |
|                 | FA 18:2      | −43.5 [−61.6 to −17.0] | +26.5 [−0.2 to +41.8]  | 0.001  | 0.003 |
|                 | C2           | −21.6 [−30.2 to −15.8] | +5.4 [−12.3 to +27.2]  | 0.002  | 0.03  |
|                 | DHA          | −34.4 [−51.6 to −14.6] | +21.5 [−13.3 to +91.2] | 0.008  | 0.02  |
|                 | DG 16:1_18:2 | −56.7 [−69.1 to −51.4] | −25.8 [−44.9 to +8.8]  | 0.02   | 0.08  |
|                 | DG 16:1_18:1 | −59.4 [−68.7 to −41.4] | −26.9 [−50.4 to −6.7]  | 0.02   | 0.08  |

| (b) Stiffness               | Metabolite    | % change from the baseline |                         | <i>P</i> value | FDR<br><i>P</i> value |
|-----------------------------|---------------|----------------------------|-------------------------|----------------|-----------------------|
|                             |               | Good                       | Poor                    |                |                       |
| Ezetimibe + statin (n = 20) | Choline       | +8.2 [−8.1 to +32.9]       | −17.2 [−25.1 to −2.4]   | 0.05           | 0.05                  |
| Statin (n = 19)             | Hippuric acid | +12.1 [−12.9 to +123.0]    | −33.1 [−53.4 to −24.6]  | 0.005          | 0.02                  |
|                             | Hypoxanthine  | −77.7 [−89.7 to +64.7]     | +69.4 [+31.6 to +259.8] | 0.02           | 0.04                  |

**Supplementary Table S2. All significantly different changes in metabolite levels (p-value < 0.05 without multiple comparisons) between the good and non-response groups according to the MRI-PDFF values after receiving two treatments (ezetimibe + statin and statin alone), (a) in the ezetimibe + statin group and (b) in the statin-only group**

| (a) Metabolite                | % change from the baseline |                        | <i>P</i> value | FDR<br><i>P</i> value |
|-------------------------------|----------------------------|------------------------|----------------|-----------------------|
|                               | Good                       | Poor                   |                |                       |
| TG 16:1_33:1                  | −46.1 [−75.9 to −29.4]     | +8.5 [−30.1 to +43.3]  | 0.003          | 0.40                  |
| PC ae C32:2                   | −15.4 [−27.8 to −13.1]     | −31.3 [−41.1 to −27.6] | 0.006          | 0.39                  |
| TG 16:0_30:2                  | −75.5 [−85.8 to −50.1]     | −47.0 [−65.1 to +62.3] | 0.006          | 0.40                  |
| Xanthine                      | −21.4 [−60.2 to +10.6]     | +19.5 [−7.3 to +64.9]  | 0.01           | 0.02                  |
| TG 16:1_32:2                  | −52.5 [−72.6 to −16.9]     | −5.0 [−32.2 to +25.1]  | 0.01           | 0.40                  |
| TG 22:6_32:0                  | −65.5 [−80.2 to −54.4]     | −49.3 [−56.0 to −15.9] | 0.01           | 0.40                  |
| TG 22:5_32:0                  | −72.2 [−82.2 to −46.6]     | −42.7 [−61.4 to −6.3]  | 0.02           | 0.40                  |
| TG 17:1_32:1                  | −61.0 [−79.5 to −33.5]     | −19.2 [−48.5 to +16.4] | 0.02           | 0.40                  |
| TG 18:0_32:2                  | −72.5 [−87.9 to −42.4]     | +4.2 [−71.8 to +63.5]  | 0.02           | 0.40                  |
| PC aa C42:1                   | 0.0 [−19.8 to +7.5]        | −27.0 [−34.5 to −10.2] | 0.02           | 0.63                  |
| TG 14:0_38:5                  | −48.6 [−70.3 to −15.8]     | −2.0 [−28.2 to +54.0]  | 0.02           | 0.40                  |
| TG 16:1_34:0                  | −60.3 [−72.3 to −28.0]     | −15.3 [−52.7 to +22.0] | 0.02           | 0.40                  |
| TG 18:1_30:0                  | −61.7 [−81.0 to −51.0]     | −48.8 [−61.4 to +23.1] | 0.02           | 0.40                  |
| TG 18:0_32:1                  | −63.3 [−73.0 to −42.0]     | −40.0 [−53.4 to +48.0] | 0.03           | 0.40                  |
| Homocysteine                  | +8.6 [−14.0 to +33.1]      | −19.9 [−26.8 to −4.4]  | 0.03           | 0.33                  |
| 3-Met-His                     | +300.8 [+50.5 to +1141.6]  | +22.9 [−38.8 to +75.5] | 0.03           | 0.33                  |
| TG 16:0_32:0                  | −55.7 [−80.4 to −26.2]     | −26.3 [−41.2 to +8.8]  | 0.03           | 0.40                  |
| TG 18:1_30:1                  | −54.1 [−72.6 to −22.4]     | −16.1 [−47.1 to +51.5] | 0.03           | 0.40                  |
| Hex2Cer(d18:1/16:0)           | −23.5 [−35.4 to −11.2]     | −39.7 [−46.8 to −24.1] | 0.04           | 0.34                  |
| TG 16:0_34:1                  | −59.4 [−70.2 to −35.9]     | −38.9 [−54.3 to −2.4]  | 0.04           | 0.40                  |
| Cer(d18:2/16:0)               | −18.3 [−32.0 to +11.5]     | 22.8 [−7.8 to +62.4]   | 0.04           | 0.55                  |
| PC aa C34:4                   | −30.1 [−47.8 to −14.5]     | −9.1 [−35.3 to +2.8]   | 0.04           | 0.63                  |
| TG 14:0_34:1                  | −64.5 [−83.8 to −46.2]     | −50.7 [−62.2 to +21.0] | 0.04           | 0.40                  |
| TG 16:0_33:1                  | −59.4 [−75.3 to −26.8]     | −27.2 [−60.2 to +27.9] | 0.05           | 0.40                  |
| TG 16:0_34:0                  | −50.7 [−67.0 to −27.6]     | −26.5 [−43.7 to −0.6]  | 0.05           | 0.40                  |
| PC ae C32:1                   | −26.9 [−35.9 to −12.3]     | −38.0 [−40.3 to −32.7] | 0.05           | 0.63                  |
| PC ae C44:6                   | +7.5 [−19.4 to +18.1]      | −16.2 [−20.4 to −9.5]  | 0.05           | 0.63                  |
| Hex2Cer(d18:1/22:0)           | −21.6 [−37.0 to −8.7]      | −45.5 [−61.7 to −22.7] | 0.05           | 0.34                  |
| Saturated_mono-unsaturated TG | −58.0 [−71.3 to −38.6]     | −39.6 [−55.7 to +8.4]  | 0.05           | 0.35                  |
| TG 14:0_36:1                  | −49.7 [−74.3 to −26.0]     | −29.5 [−49.2 to +26.9] | 0.05           | 0.40                  |

| (b) Metabolite | % change from the baseline |                        | <i>P</i> value | FDR<br><i>P</i> value |
|----------------|----------------------------|------------------------|----------------|-----------------------|
|                | Good                       | Poor                   |                |                       |
| TG 20:5_36:2   | −43.5 [−51.1 to −26.5]     | +14.2 [−15.0 to +92.3] | <0.001         | 0.04                  |
| TG 18:1_38:6   | −53.2 [−63.2 to −42.4]     | −13.8 [−37.2 to +23.3] | <0.001         | 0.04                  |
| C2             | −22.2 [−30.0 to −17.1]     | +5.4 [−12.3 to +29.5]  | 0.001          | 0.007                 |
| FA 18:2        | −39.0 [−60.3 to −6.3]      | +8.6 [−18.1 to +40.0]  | 0.001          | 0.009                 |
| TG 16:0_40:6   | −47.1 [−61.6 to −39.6]     | −32.8 [−38.8 to −6.1]  | 0.002          | 0.15                  |
| FA 18:1        | −42.9 [−51.4 to −19.1]     | +15.8 [−28.1 to +53.0] | 0.003          | 0.009                 |
| TG 16:0_40:8   | −57.7 [−70.6 to −26.2]     | −17.3 [−38.1 to +9.8]  | 0.003          | 0.17                  |
| TG 18:2_38:6   | −56.5 [−64.0 to −40.2]     | −24.2 [−38.1 to −10.6] | 0.006          | 0.24                  |
| TG 16:0_40:7   | −50.1 [−66.1 to −35.7]     | −7.7 [−36.7 to +20.6]  | 0.008          | 0.28                  |
| DHA            | −36.1 [−46.0 to −17.4]     | +13.3 [−20.5 to +78.2] | 0.009          | 0.02                  |
| TG 22:6_34:1   | −58.1 [−62.3 to −29.7]     | −18.8 [−39.1 to +7.4]  | 0.009          | 0.25                  |
| TG 22:6_34:2   | −48.6 [−67.9 to −26.1]     | −19.2 [−33.5 to +8.6]  | 0.01           | 0.28                  |
| TG 22:5_34:2   | −57.0 [−64.7 to −30.5]     | −26.6 [−42.9 to −6.4]  | 0.01           | 0.28                  |
| TG 18:1_38:7   | −38.7 [−53.2 to +2.7]      | +11.9 [−4.6 to +45.3]  | 0.02           | 0.28                  |
| TG 20:5_36:3   | −22.8 [−57.8 to +8.0]      | +46.5 [+1.5 to +104.0] | 0.02           | 0.28                  |
| TG 18:2_38:5   | −49.0 [−54.6 to −25.6]     | −9.5 [−32.6 to +14.8]  | 0.02           | 0.29                  |
| PC aa C42:1    | −27.5 [−32.8 to −16.2]     | −14.0 [−21.7 to −1.2]  | 0.02           | 0.51                  |
| PC aa C38:6    | −37.7 [−43.3 to −11.4]     | −20.7 [−30.7 to +3.1]  | 0.02           | 0.51                  |
| PC aa C40:6    | −43.8 [−50.9 to −6.2]      | −17.5 [−30.3 to −7.7]  | 0.02           | 0.51                  |
| TG 22:6_32:0   | −72.1 [−81.6 to −54.5]     | −47.9 [−67.1 to −15.0] | 0.02           | 0.37                  |
| TG 20:5_34:2   | −52.4 [−66.8 to −26.4]     | −15.3 [−44.8 to +26.1] | 0.03           | 0.41                  |
| TG 22:5_34:1   | −44.6 [−64.5 to −32.0]     | −29.6 [−44.3 to +0.9]  | 0.03           | 0.41                  |
| TG 20:0_32:3   | −62.4 [−67.6 to −25.9]     | −27.3 [−44.7 to +5.0]  | 0.03           | 0.41                  |
| TG 20:1_32:3   | −61.7 [−79.3 to −32.1]     | −4.6 [−57.2 to +49.9]  | 0.04           | 0.43                  |
| PC aa C38:0    | −36.9 [−42.1 to −25.2]     | −23.4 [−31.5 to −8.6]  | 0.04           | 0.58                  |
| TG 18:3_36:4   | −51.2 [−70.8 to −28.3]     | −15.6 [−51.1 to +14.0] | 0.04           | 0.43                  |
| TG 18:3_35:2   | −47.5 [−71.0 to −38.2]     | −28.8 [−43.3 to +33.1] | 0.04           | 0.43                  |
| TG 18:1_36:5   | −45.4 [−63.4 to −19.9]     | −27.7 [−40.4 to +9.8]  | 0.05           | 0.43                  |
| DG 16:1_18:2   | −56.6 [−65.4 to −35.3]     | −26.2 [−44.9 to +5.6]  | 0.05           | 0.38                  |
| TG 22:6_32:1   | −65.6 [−71.6 to −36.8]     | −36.3 [−56.6 to −26.2] | 0.05           | 0.43                  |
| TG 20:0_32:4   | −65.5 [−67.5 to −34.6]     | −28.4 [−43.3 to +8.9]  | 0.05           | 0.43                  |
| TG 22:6_34:3   | −54.7 [−70.4 to −36.1]     | −37.4 [−48.1 to −10.8] | 0.05           | 0.43                  |
| PC aa C38:5    | −14.1 [−45.0 to −5.2]      | −1.2 [−15.1 to +6.3]   | 0.05           | 0.58                  |

**Supplementary Table S3. All significant baseline metabolite levels (Wilcoxon's test, P value of <0.05 was considered significant, and the FDR P value of <0.1) between the good and non-response groups according to the MRI-PDF values after receiving two treatments (ezetimibe + statin and statin alone), (a) in the ezetimibe + statin group and (b) in the statin-only group**

| (a) Metabolite      | Baseline concentration (μM) [Q1-Q3] |                     | <i>P</i> value | FDR <i>P</i> value |
|---------------------|-------------------------------------|---------------------|----------------|--------------------|
|                     | Good                                | Poor                |                |                    |
| Hex3Cer(d18:1/16:0) | 0.98 [0.83 to 1.17]                 | 1.36 [1.19 to 1.45] | 0.001          | 0.03               |

| (b) Metabolite       | Baseline concentration (μM) [Q1-Q3] |                        | <i>P</i> value | FDR <i>P</i> value |
|----------------------|-------------------------------------|------------------------|----------------|--------------------|
|                      | Good                                | Poor                   |                |                    |
| Ornithine            | 95.0 [72.2 to 113.8]                | 141.4 [125.5 to 172.2] | <0.001         | 0.007              |
| FA 18:2              | 60.8 [56.3 to 73.3]                 | 41.3 [37.7 to 62.4]    | 0.01           | 0.04               |
| FA 18:1              | 251.7 [206.8 to 308.2]              | 165.7 [127.0 to 230.9] | 0.01           | 0.04               |
| Methionine sulfoxide | 0.64 [0.48 to 0.86]                 | 0.97 [0.76 to 1.12]    | 0.01           | 0.09               |
| Homocysteine         | 3.94 [3.08 to 5.10]                 | 5.33 [4.35 to 6.84]    | 0.01           | 0.09               |
| Kynurenine           | 1.77 [1.45 to 2.14]                 | 2.28 [1.98 to 2.53]    | 0.02           | 0.09               |
| DG 18:2_18:2         | 9.79 [9.00 to 15.07]                | 6.82 [4.56 to 9.08]    | 0.02           | 0.099              |
| DG 16:1_18:2         | 1.93 [1.53 to 2.06]                 | 1.45 [1.04 to 1.78]    | 0.02           | 0.099              |

Supplementary Figure S1. Study design

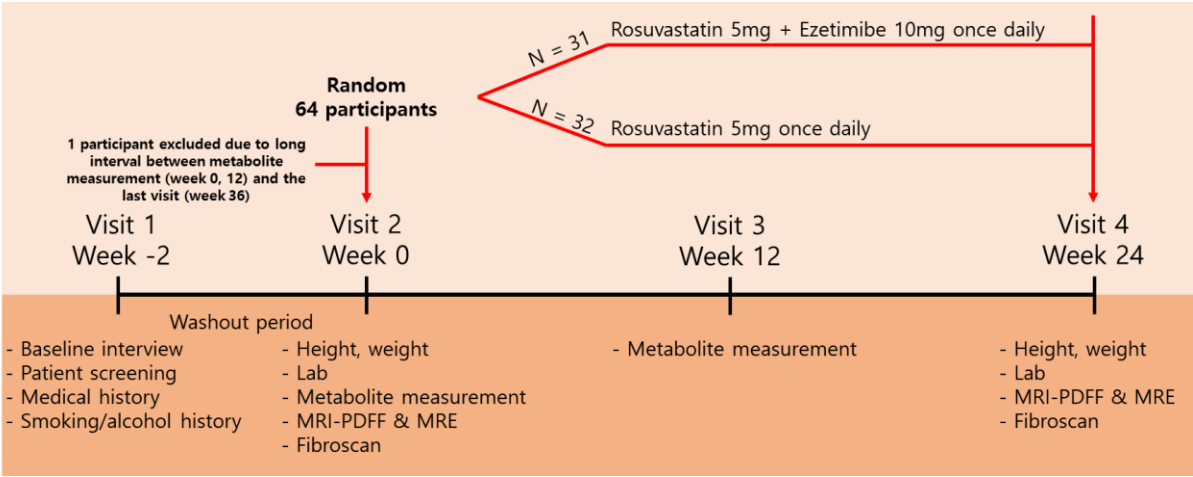

Supplementary Figure S2. Box plots of the % change in metabolite levels from baseline concentration between the two treatment groups. Significant changes in metabolite levels between the good and non-responders, liver fat measured by (a) MRI-PDFF, and liver stiffness measured by (b) MRE

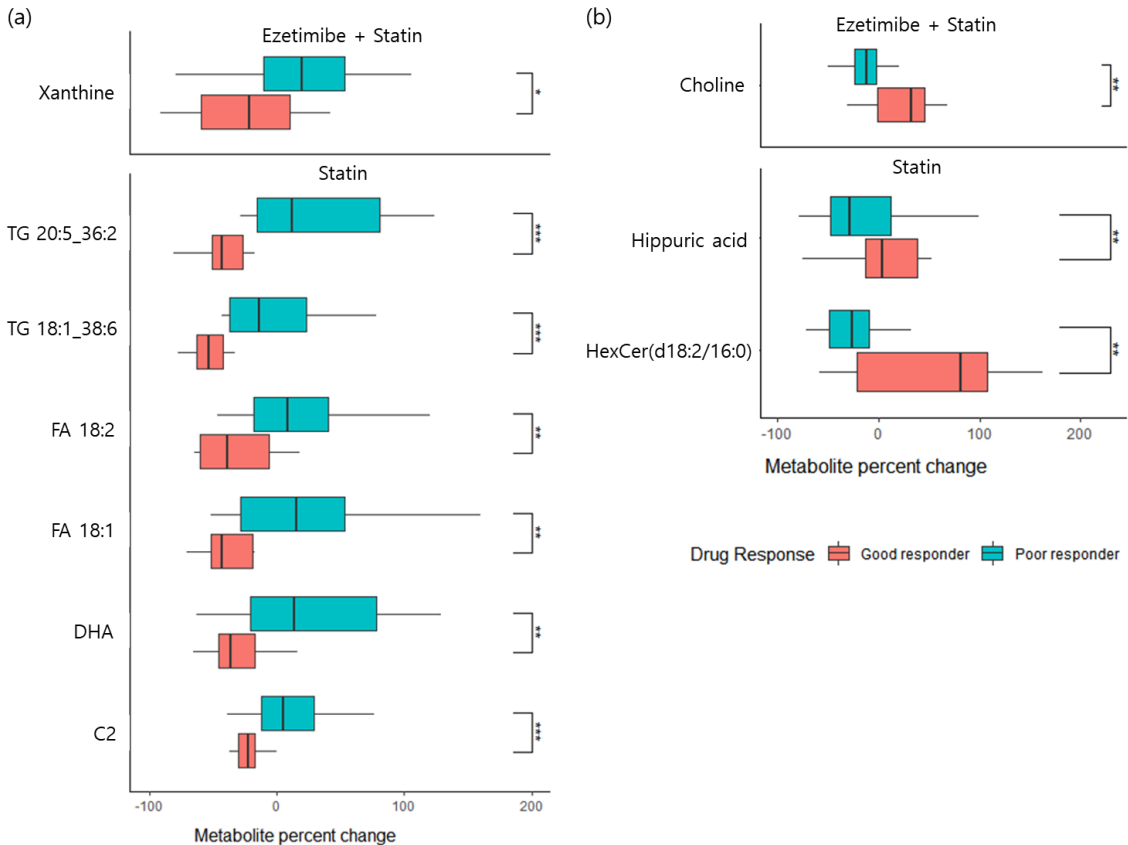

Supplement: s1 [file s1]
